# Supplementary figures and images for: Potential ofBorojoa patinoiCuatrecasas water extract to inhibit nosocomial antibiotic resistant bacteria and cancer cell proliferationin vitro
Source: Royal Society of Chemistry journal article supplement (doi:10.1039/c7fo01542a), 2018-01-01

Figure S1: Extract Ion Currents (XICs) for the target phenolic compounds

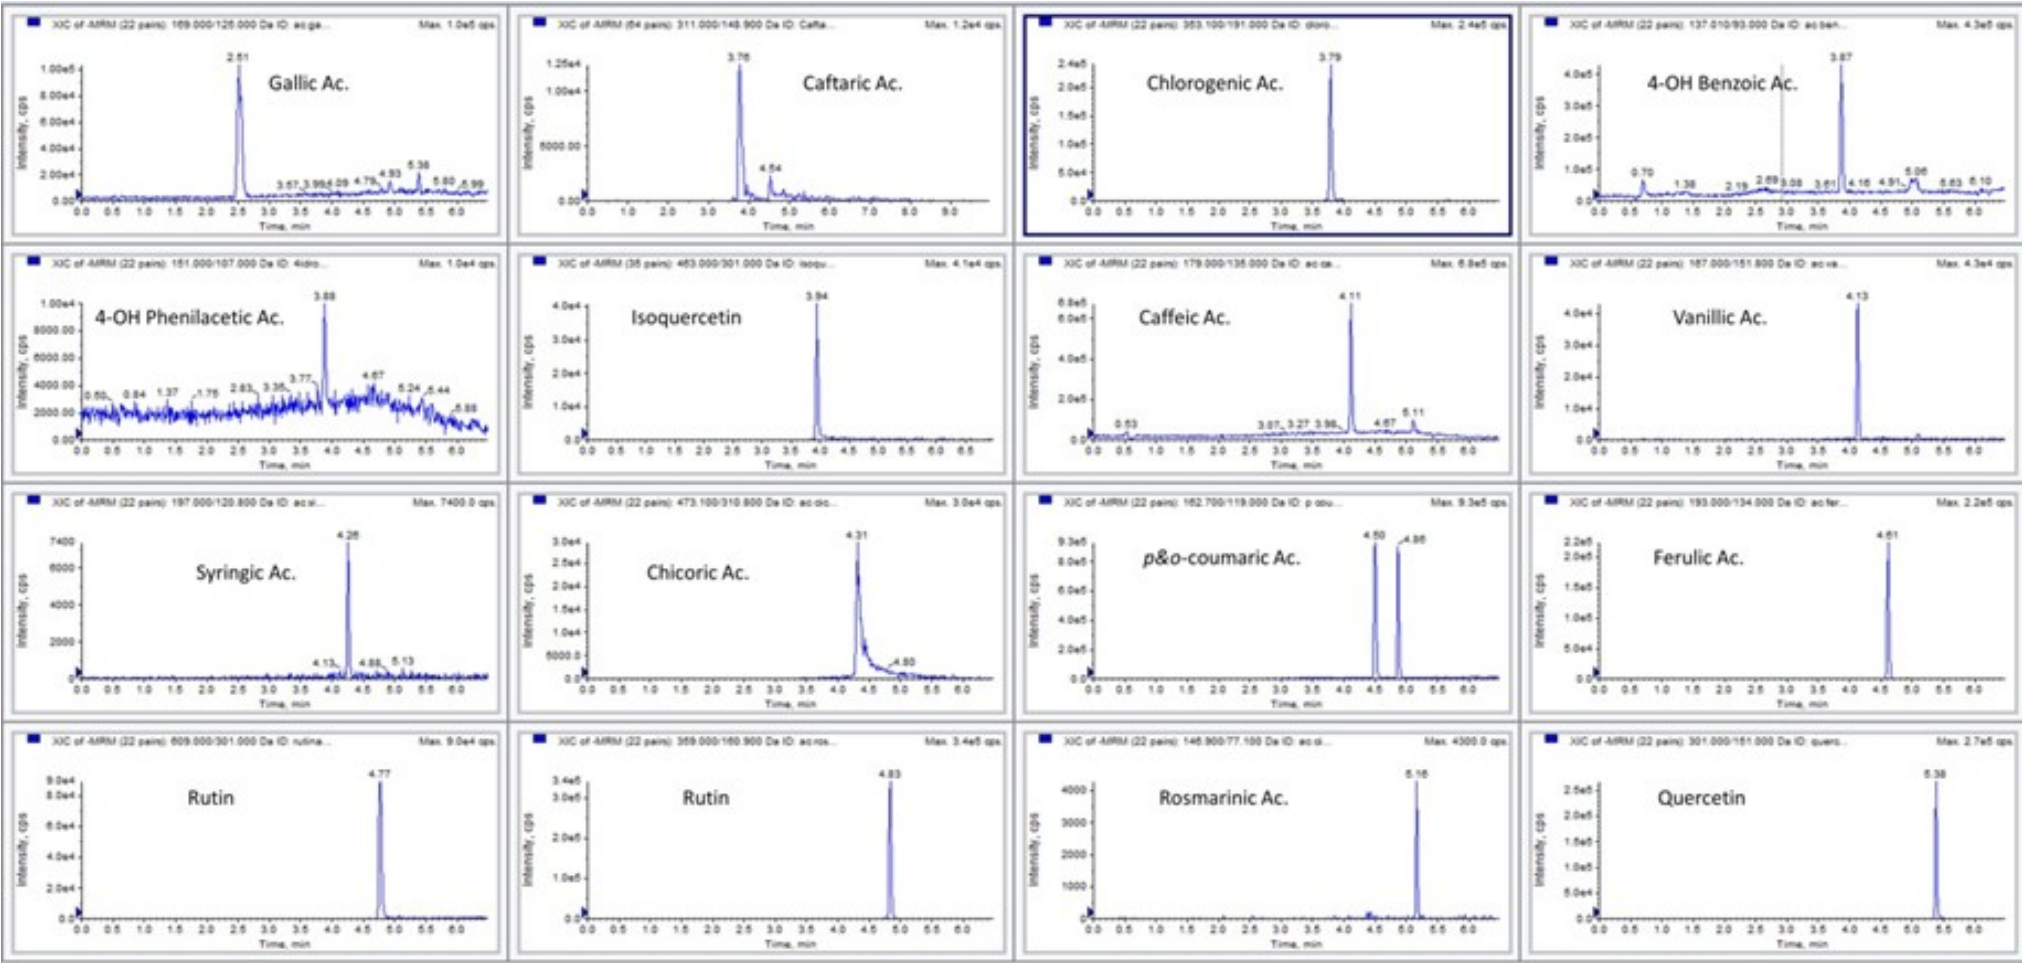

Supplement: c7fo01542a1.pdf [file c7fo01542a1.pdf]
